# Supplementary material
Source: PubMed Central journal article supplement (PMC3586797)

**Supplementary Materials:**

**Supplementary Table 1a: Demographic and Clinical Features of Study Participants with Bipolar Disorder (Li-)**

| <b>Sex</b> | <b>Age (years)</b> | <b>Current Medication</b> | <b>Past Medications</b>                                                       | <b>Time Off All Medication before MRI</b> | <b>Mood State</b> | <b>Bipolar I or II?</b> |
|------------|--------------------|---------------------------|-------------------------------------------------------------------------------|-------------------------------------------|-------------------|-------------------------|
| Female     | 36                 | None                      | Tranylecypromine                                                              | >1 month                                  | Depressed         | BPI                     |
| Male       | 29                 | None                      | None                                                                          | --                                        | Depressed         | BPI                     |
| Female*    | 26                 | None                      | Lorazepam,<br>Valproic acid,<br>Lithium,<br>Tranylecypromine,<br>Thioridazine | 30 weeks                                  | Euthymic          | BPI                     |
| Male       | 31                 | None                      | Fluoxetine                                                                    | 52 weeks                                  | Euthymic          | BPI                     |
| Male**     | 41                 | None                      | Lithium<br><br>Fluoxetine                                                     | >1 year                                   | Depressed         | BPII                    |
| Male       | 45                 | None                      | None                                                                          | --                                        | Hypomanic         | BPII                    |
| Female     | 56                 | None                      | Imipramine,<br><br>Amitriptyline                                              | 19 years                                  | Depressed         | BPII                    |
| Female     | 45                 | Citalopram                | Citalopram                                                                    | --                                        | Euthymic          | BPII                    |

\*Subject previously used antipsychotic medication for 2 weeks, 2 years prior to scan date, and previously used lithium (maximum dose 1125 mg) for 107 weeks (discontinued 6 months prior to scan date)

\*\*Subject previously used lithium (maximum dose 1500 mg) for 44 weeks (discontinued 13 months prior to scan date)

**Supplementary Table 1b: Demographic and Clinical Features of Study Participants with Bipolar Disorder (Li+)**

| <b>Sex</b> | <b>Age (years)</b> | <b>Current Medication</b> | <b>Weeks on lithium</b> | <b>Mood state</b> | <b>Bipolar I or II?</b> |
|------------|--------------------|---------------------------|-------------------------|-------------------|-------------------------|
| Female     | 30                 | Lithium                   | 3                       | Depressed         | BPI                     |
| Male       | 41                 | Lithium                   | 36                      | Euthymic          | BPI                     |
| Male       | 36                 | Lithium                   | 10                      | Euthymic          | BPI                     |
| Female     | 44                 | Lithium, Tranylcypromine  | 4                       | Depressed         | BPI                     |
| Female     | 40                 | Lithium                   | 240                     | Euthymic          | BPI                     |
| Male       | 42                 | Lithium                   | 96                      | Euthymic          | BPI                     |
| Male       | 40                 | Lithium                   | 384                     | Euthymic          | BPI                     |
| Female     | 28                 | Lithium                   | 16                      | Depressed         | BPI                     |
| Male       | 22                 | Lithium                   | 52                      | Euthymic          | BPI                     |
| Female     | 52                 | Lithium                   | 150                     | Euthymic          | BPI                     |
| Male       | 37                 | Lithium                   | 27                      | Depressed         | BPI                     |
| Male       | 21                 | Lithium                   | 21                      | Depressed         | BPI                     |
| Male       | 26                 | Lithium                   | 29                      | Euthymic          | BPI                     |
| Male       | 30                 | Lithium                   | 33                      | Euthymic          | BPI                     |
| Male       | 24                 | Lithium                   | 20                      | Euthymic          | BPI                     |
| Female     | 29                 | Lithium, Levothyroxine    | 264                     | Euthymic          | BPI                     |

|        |    |                                          |      |           |      |
|--------|----|------------------------------------------|------|-----------|------|
| Female | 26 | Lithium,<br>Tranlycypromine              | 6    | Depressed | BPI  |
| Female | 47 | Lithium                                  | 1000 | Euthymic  | BPI  |
| Male   | 25 | Lithium                                  | 20   | Euthymic  | BPII |
| Female | 61 | Lithium,<br>Levothyroxine,<br>Citalopram | 150  | Euthymic  | BPII |

# Cortical GMD Differences as a Function of Lithium Treatment

Bipolar Li+ versus Bipolar Li-

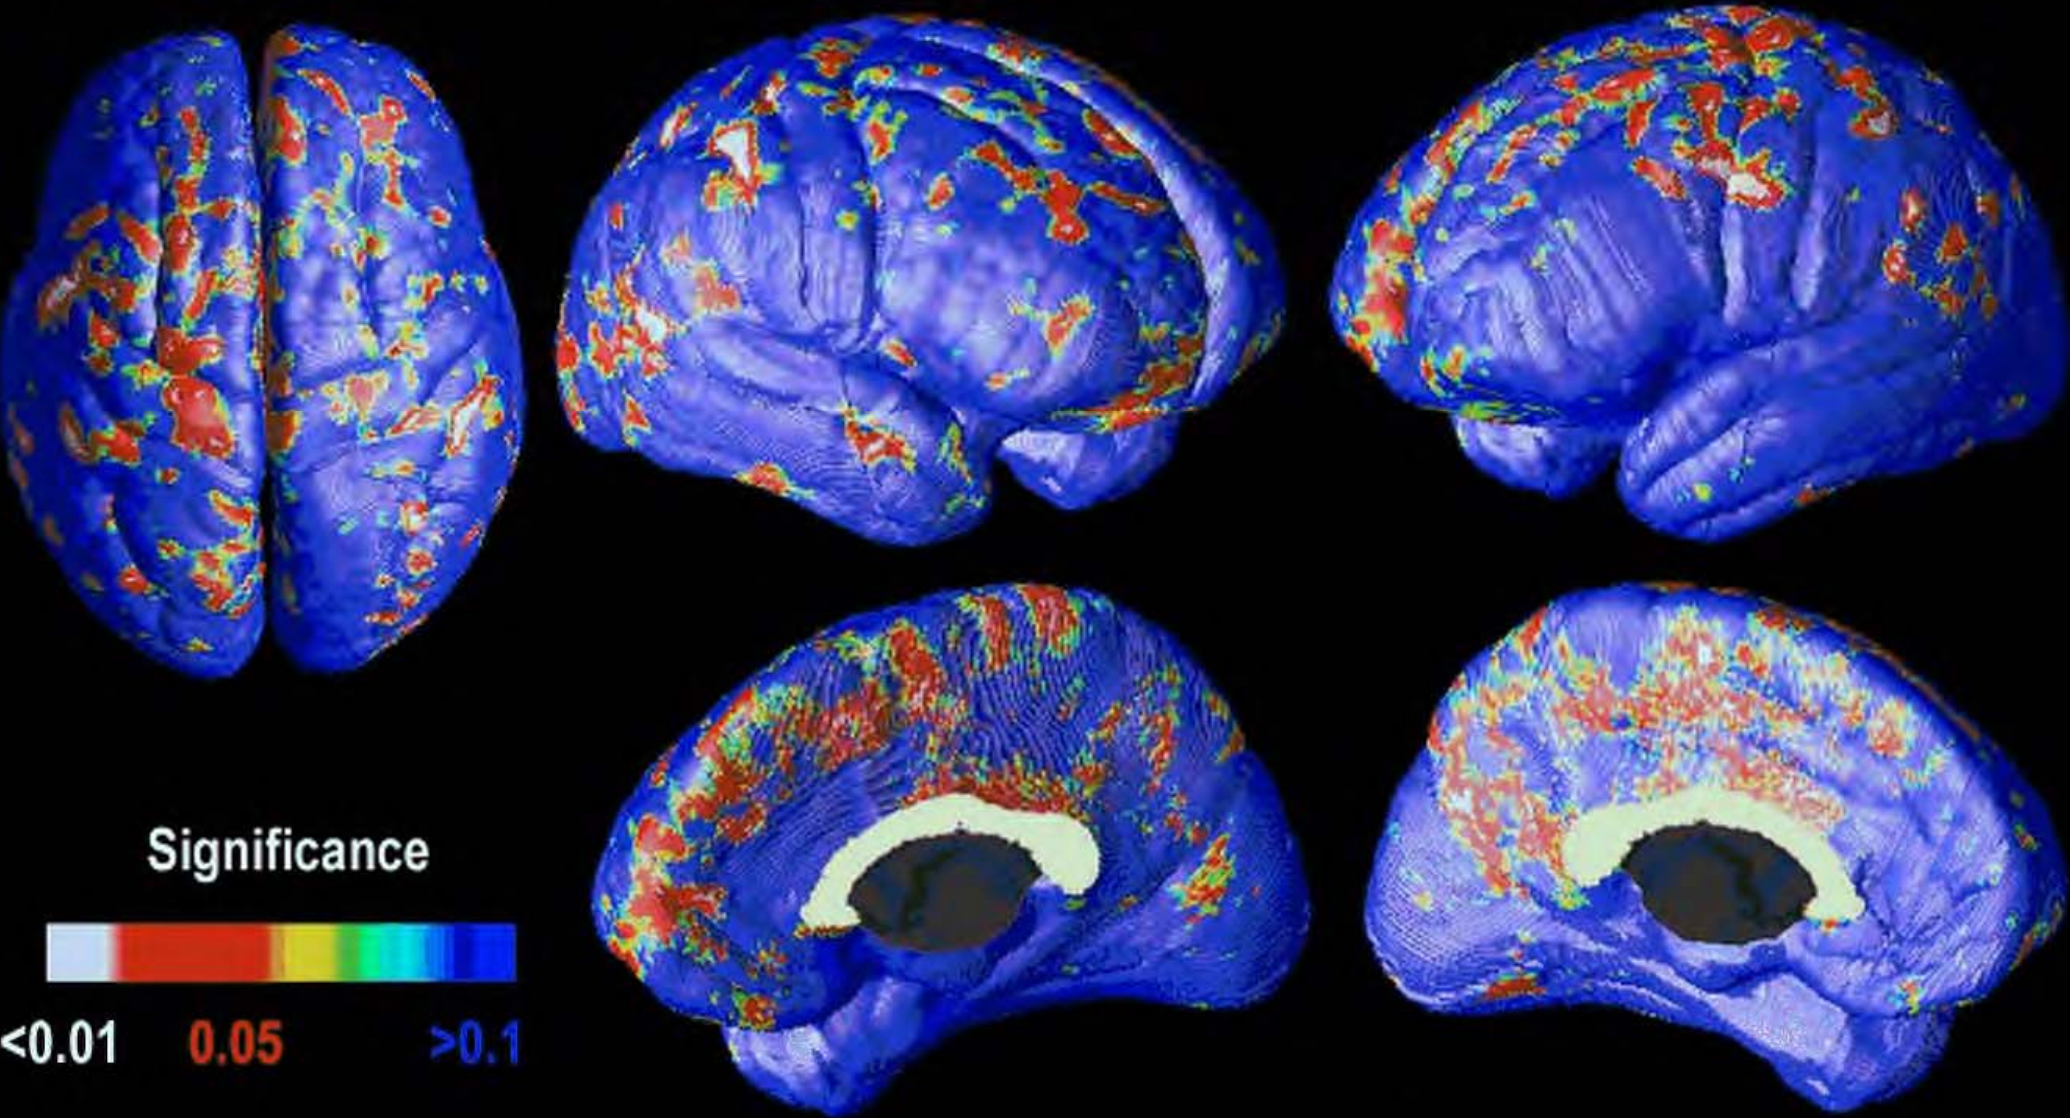

Supplement: NIHMS440476-supplement-Supplement_Files.pdf [file NIHMS440476-supplement-Supplement_Files.pdf]
